# Supplementary material for: Physiological and Molecular Characterization of New Apricot Cultivars Grafted on Different Prunus Rootstocks
Source: MDPI journal article supplement (doi:10.3390/agronomy11081464), 2021-07-23
Supplement: s1 [file s1]

# Supplementary Materials:

**Table S1.** Pearson correlations coefficients of all parameters studied at different developmental stages after grafting. At 42 DAG (microscopy observations), 3 months after grating (graft length, n° leaves, gene expression of PAL), and one year after grafting (area of leaves and graft union diameter).

|                             | Graft take | Cell proliferation | Cell arrangement | Necrotic line | Graft length | Number of leaves | PAL1 gene | PAL2 gene | Leaf area | Graft union diameter |
|-----------------------------|------------|--------------------|------------------|---------------|--------------|------------------|-----------|-----------|-----------|----------------------|
| <b>Graft take</b>           | 1          | -0.021             | -0.142           | -0.004        | 0.567**      | 0.532**          | 0.146     | -0.093    | 0.162     | -0.308*              |
| <b>Cell proliferation</b>   | -0.021     | 1                  | 0.783**          | -0.776**      | -0.251       | -0.101           | -0.148    | 0.092     | 0.137     | 0.265                |
| <b>Cell arrangement</b>     | -0.142     | 0.783**            | 1                | -0.669**      | -0.235       | -0.102           | -0.160    | 0.312*    | 0.150     | 0.582**              |
| <b>Necrotic line</b>        | -0.004     | -0.776**           | -0.669**         | 1             | 0.097        | -0.084           | 0.030     | -0.127    | -0.199    | -0.325*              |
| <b>Graft length</b>         | 0.567**    | -0.251             | -0.235           | 0.097         | 1            | 0.714**          | 0.177     | -0.122    | -0.003    | -0.290*              |
| <b>Number of leaves</b>     | 0.532**    | -0.101             | -0.102           | -0.084        | 0.714**      | 1                | -0.003    | -0.055    | 0.010     | -0.140               |
| <b>PAL1 gene</b>            | 0.146      | -0.148             | -0.160           | 0.030         | 0.177        | -0.003           | 1         | -0.070    | -0.082    | 0.172                |
| <b>PAL2 gene</b>            | -0.093     | 0.092              | 0.312*           | -0.127        | -0.122       | -0.055           | -0.070    | 1         | 0.042     | 0.308*               |
| <b>Leaf area</b>            | 0.162      | 0.137              | 0.150            | -0.199        | -0.003       | 0.010            | -0.082    | 0.042     | 1         | -0.122               |
| <b>Graft union diameter</b> | -0.308*    | 0.265              | 0.582**          | -0.325*       | -0.290*      | -0.140           | 0.172     | 0.308*    | -0.122    | 1                    |

\*\*Correlation significant at the 0.01 level (bilateral)

\*Correlation significant at the 0.05 level (bilateral)
